# Supplementary material for: Enhancing the Dye-Rejection Efficiencies and Stability of Graphene Oxide-Based Nanofiltration Membranes via Divalent Cation Intercalation and Mild Reduction
Source: MDPI journal article supplement (doi:10.3390/membranes12040402), 2022-04-02
Supplement: s1 [file s1]

***Supplementary Material for***

**Dye Rejection Efficiencies and Stability Enhancement of  
Graphene Oxide-Based Nanofiltration Membranes via Divalent  
Cation Intercalation and Mild Reduction**

Hobin Jee <sup>1,†</sup>, Jaewon Jang <sup>2,†</sup>, Yesol Kang <sup>3</sup>, Tasnim Eisa <sup>4</sup>, Kyu-Jung Chae <sup>4</sup>, In S. Kim <sup>3</sup>  
and Euntae Yang <sup>1,\*</sup>

1 Department of Marine Environmental Engineering, Gyeongsang National University,  
Tongyoung 53064, Korea; hbj99@gnu.ac.kr

2 KEPCO Research Institute (KEPRI), Korea Electric Power Corporation (KEPCO), Naju 58277, Korea;  
jwjang@gm.gist.ac.kr

3 School of Earth Sciences and Environmental Engineering, Gwangju Institute of Science and Technology  
(GIST), Gwangju 61005, Korea; yesol7964@gist.ac.kr (Y.K.); iskim@gist.ac.kr (I.S.K.)

4 Department of Environmental Engineering, Korea Maritime and Ocean University, Busan 49112, Korea;  
tasnim.i.eisa@gmail.com (T.E.); kkjdream@kmou.ac.kr (K.-J.C.)

\* Correspondence: yet83@gnu.ac.kr

† These authors contributed equally to this work.

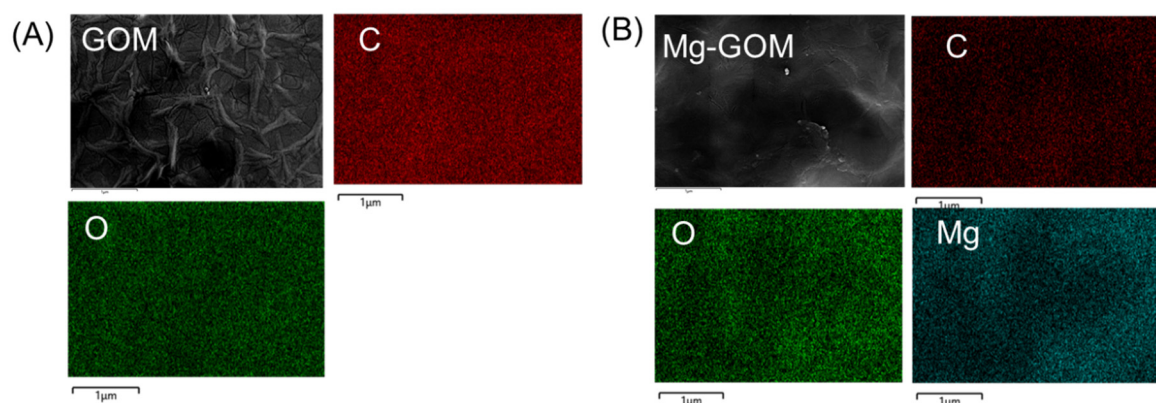

**Figure S1.** EDX mapping of (A) GOM and (B) Mg-GOM.

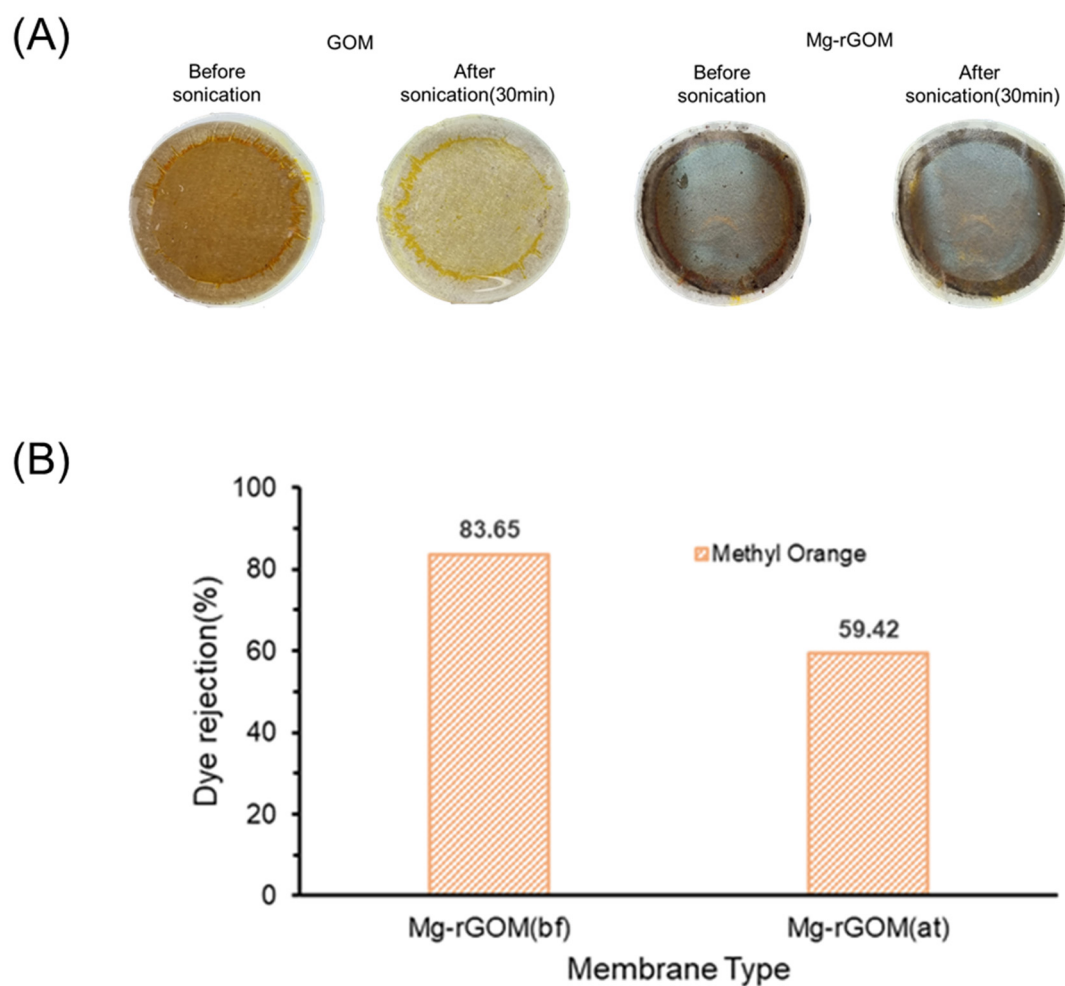

**Figure S2.** (A) Photographs of the laminar GO layers after rejection test with a methyl orange dye solution before and after 30-min sonication, and (B) comparison of methyl orange rejection efficiency of the Mg-rGOM(TH) before and after 30-min sonication.
